# Supplementary material for: COVID-19 Severity Is Associated with Differential Antibody Fc-Mediated Innate Immune Functions
Source: PubMed Central journal article supplement (PMC8092230; doi:10.1128/mbio.00281-21), 2021-04-20

# Supplementary Figure 3

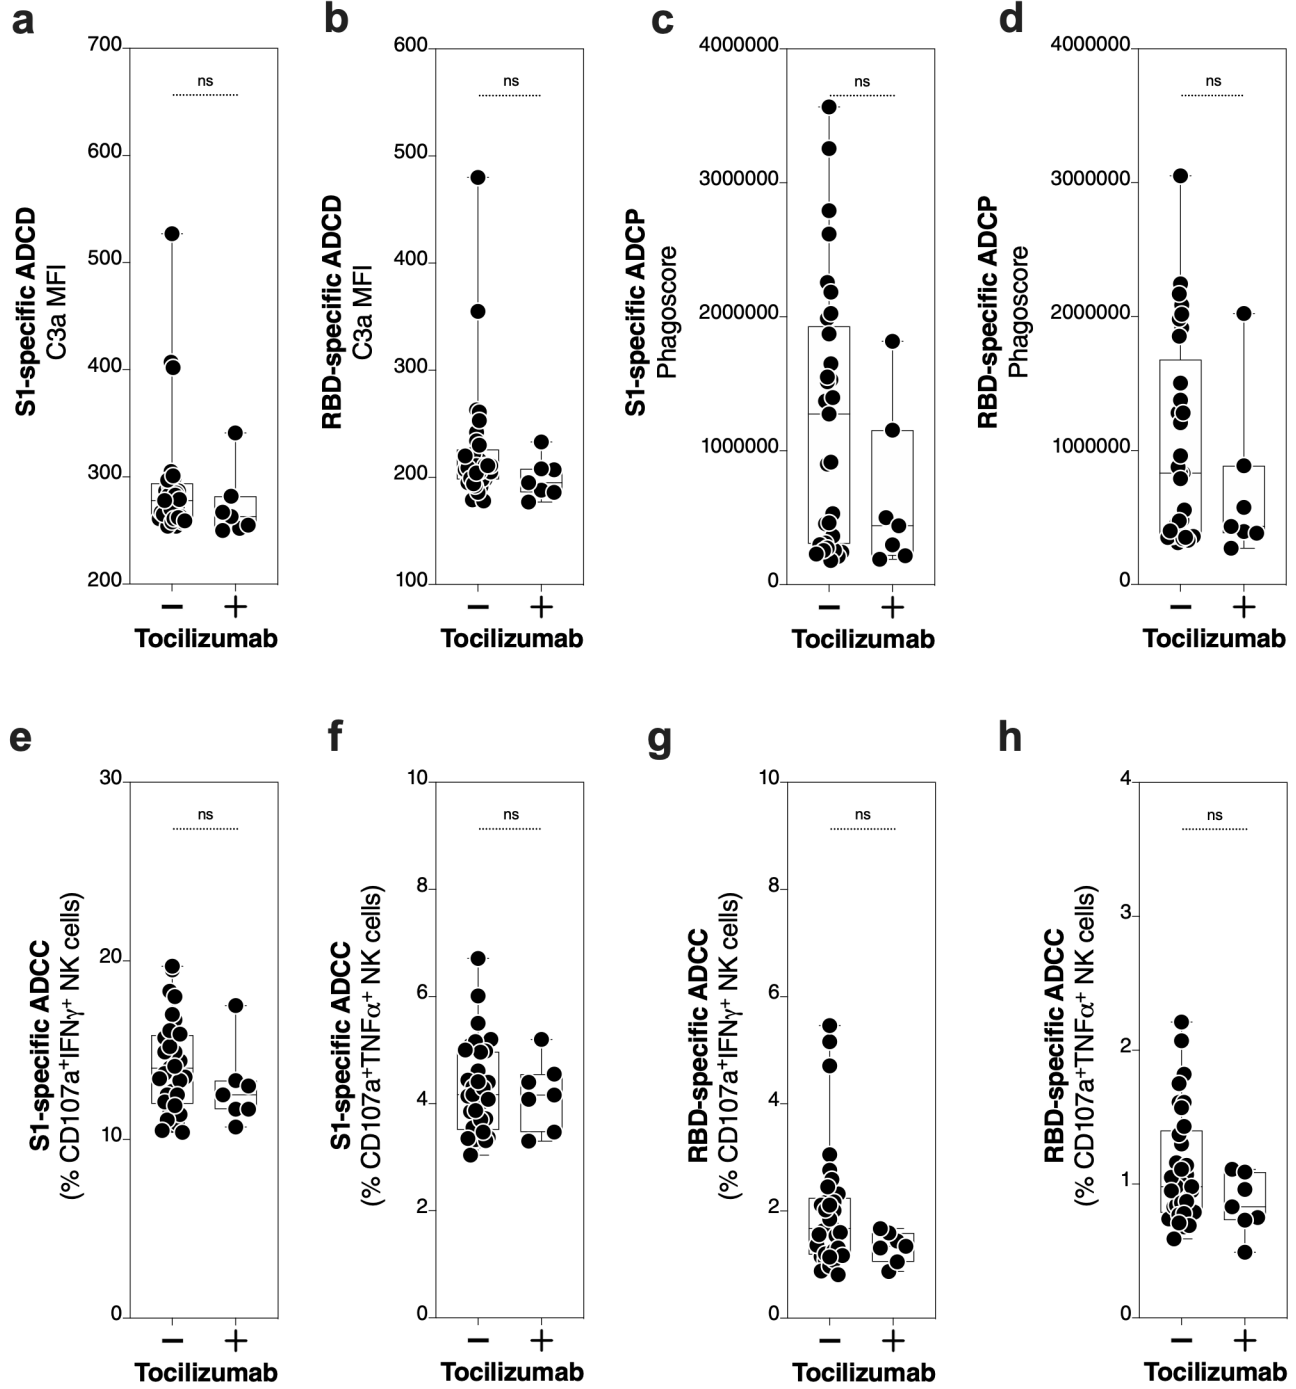

Supplement: mBio.00281-21-sf003.pdf [file mBio.00281-21-sf003.pdf]
