# Supplementary material for: COVID-19 Severity Is Associated with Differential Antibody Fc-Mediated Innate Immune Functions
Source: PubMed Central journal article supplement (PMC8092230; doi:10.1128/mbio.00281-21), 2021-04-20
Supplement: mBio.00281-21-st001.pdf [file mBio.00281-21-st001.pdf]

**Supplementary Table 1.** Demographic and clinical characteristics of the study cohort

|                                | SARS-CoV2 Negative | SARS-CoV2 Positive | SARS-CoV2 Positive | P value**                 |
|--------------------------------|--------------------|--------------------|--------------------|---------------------------|
|                                | -                  | outpatients        | Inpatients         | Outpatients vs inpatients |
| number ( <i>n</i> )            | 20                 | 20                 | 40                 | -                         |
| Female, <i>n</i> (%)           | 10 (50)            | 12 (60)            | 18 (45)            | 0.41                      |
| Age, years, median (IQR)       | 55.5 (15.6)        | 52.5 (12.75)       | 58.5 (6)           | -                         |
| Body mass index (BMI)          |                    |                    |                    |                           |
| Normal Weight (<25), %         | -                  | 6.7*               | 15                 | 0.66                      |
| Overweight/obese (>25), %      | -                  | 93.3*              | 85                 | 0.66                      |
| Pre-diabetes, %                | -                  | 6.7*               | 22.5               | 0.25                      |
| Diabetes Mellitus (DM), %      | -                  | 6.7*               | 42.5               | 0.01                      |
| High blood pressure, %         | -                  | 33.3*              | 60                 | 0.13                      |
| Asthma, %                      | -                  | 13.3*              | 10                 | 0.66                      |
| Hydroxychloroquine, %          | -                  | 6.7*               | 47.5               | -                         |
| Remdesivir, %                  | -                  | -                  | 15                 | -                         |
| Tocilizumab, %                 | -                  | -                  | 17.5               | -                         |
| Chronic Steroid Use, %         | -                  | -                  | 15                 | -                         |
| Acute Steroid Use, %           | -                  | -                  | 30                 | -                         |
| Plasma IV nutrition, %         | -                  | -                  | 0                  | -                         |
| Enteral nutrition use, %       | -                  | -                  | 40                 | -                         |
| Antibiotic administration, %   | -                  | -                  | 72.5               | -                         |
| Ethnicity                      |                    |                    |                    |                           |
| African American, <i>n</i> (%) | 0                  | 0                  | 16 (40)            | -                         |
| Hispanic or Latino             | 0                  | 2 (10.0)           | 15 (37.5)          | -                         |
| Caucasian, <i>n</i> (%)        | 3 (15.0)           | 13 (65.0)          | 7 (17.5)           | -                         |
| Other, <i>n</i> (%)            | 2 (10.0)           | 1 (5.0)            | 1 (2.5)            | -                         |
| Unknown, <i>n</i> (%)          | 15 (75.0)          | 4 (20.0)           | 1 (2.5)            | -                         |

\*Based on 15 out of 20 donors with available data

\*\* Fisher's exact test
