# Supplementary material for: COVID-19 Severity Is Associated with Differential Antibody Fc-Mediated Innate Immune Functions
Source: PubMed Central journal article supplement (PMC8092230; doi:10.1128/mbio.00281-21), 2021-04-20
Supplement: mBio.00281-21-st002.pdf [file mBio.00281-21-st002.pdf]

**Supplementary Table 2.** A list of plasma markers measured in this study.

| <b>Marker</b>     | <b>Name</b>                                                               | <b>Method of Measurement</b>                                 |
|-------------------|---------------------------------------------------------------------------|--------------------------------------------------------------|
| CRP               | C-reactive protein                                                        | ELISA; R&D Systems                                           |
| IP-10             | C-X-C motif chemokine ligand 10 (CXCL10)                                  | Multiplex meso scale cytokine assay                          |
| MCP-2             | Chemokine (C-C motif) ligand 8 (CCL8)                                     | Multiplex meso scale cytokine assay                          |
| Fractalkine       | chemokine (C-X3-C motif) ligand 1 (CX3CL1)                                | Multiplex meso scale cytokine assay                          |
| C3a               | Complement component 3a                                                   | ELISA; Thermo Fischer                                        |
| d-dimer           | D-dimer                                                                   | ELISA; Thermo Fischer                                        |
| Gal-1             | Galectin-1                                                                | ELISA; R&D Systems                                           |
| Gal-3             | Galectin-3                                                                | ELISA; R&D Systems                                           |
| Gal-9             | Galectin-9                                                                | ELISA; R&D Systems                                           |
| GM-CSF            | Granulocyte-macrophage colony-stimulating factor                          | Multiplex meso scale cytokine assay                          |
| GDF-15            | Growth/differentiation factor 15                                          | ELISA; R&D Systems                                           |
| Zonulin           | haptoglobin 2 precursor                                                   | ELISA; MyBiosorce                                            |
| IFN- $\beta$      | Interferon beta                                                           | Multiplex meso scale cytokine assay                          |
| IFN- $\gamma$     | Interferon gamma                                                          | Multiplex meso scale cytokine assay                          |
| IFN- $\alpha$ 2a  | interferon $\alpha$ 2a                                                    | Multiplex meso scale cytokine assay                          |
| IL-10             | Interleukin 10                                                            | Multiplex meso scale cytokine assay                          |
| IL-12/IL-23p40    | Interleukin 12 p70                                                        | Multiplex meso scale cytokine assay                          |
| IL-12p70          | Interleukin 12 p70                                                        | Multiplex meso scale cytokine assay                          |
| IL-13             | Interleukin 13                                                            | Multiplex meso scale cytokine assay                          |
| IL-1 $\beta$      | Interleukin 1 $\beta$                                                     | Multiplex meso scale cytokine assay                          |
| IL-2              | Interleukin 2                                                             | Multiplex meso scale cytokine assay                          |
| IL-21             | Interleukin 21                                                            | Multiplex meso scale cytokine assay                          |
| IL-22             | Interleukin 22                                                            | Multiplex meso scale cytokine assay                          |
| IL-23             | Interleukin 23                                                            | Multiplex meso scale cytokine assay                          |
| IL-33             | Interleukin 33                                                            | Multiplex meso scale cytokine assay                          |
| IL-4              | Interleukin 4                                                             | Multiplex meso scale cytokine assay                          |
| IL-6              | Interleukin 6                                                             | Multiplex meso scale cytokine assay                          |
| IL-15             | Interleukin-12/interleukin 23 p40                                         | Multiplex meso scale cytokine assay                          |
| I-FABP            | Intestinal fatty-acid binding protein                                     | ELISA; R&D Systems                                           |
| LBP               | Lipopolysaccharide binding protein                                        | ELISA; R&D Systems                                           |
| MIP-1 $\alpha$    | Macrophage inflammatory protein alpha                                     | Multiplex meso scale cytokine assay                          |
| MPO               | Neutrophil myeloperoxidase                                                | ELISA; Thermo Fischer                                        |
| OCLN              | Occludin                                                                  | ELISA; Biomatik                                              |
| Reg3A             | Regenerating Family Member 3 Alpha                                        | ELISA; RayBiotech                                            |
| sCD14             | Soluble CD14                                                              | ELISA; R&D Systems                                           |
| sCD163            | Soluble CD163                                                             | ELISA; R&D Systems                                           |
| SDF-1a            | stromal cell-derived factor 1 (SDF1) or C-X-C motif chemokine 12 (CXCL12) | Multiplex meso scale cytokine assay                          |
| TNF- $\alpha$     | tumor necrosis factor alpha                                               | Multiplex meso scale cytokine assay                          |
| $\beta$ -D-glucan | $\beta$ -D-glucan                                                         | Limulus Amebocyte Lysate (LAL) assay; GlucateLL Kit, CapeCod |
